# Supplementary material for: Association of Diet With Erectile Dysfunction Among Men in the Health Professionals Follow-up Study
Source: PubMed Central journal article supplement (PMC7666422; doi:10.1001/jamanetworkopen.2020.21701), 2020-11-13

## Supplemental Online Content

Bauer SR, Breyer BN, Stampfer MJ, Rimm EB, Giovannucci EL, Kenfield SA.  
Association of diet with erectile dysfunction among men in the Health Professionals  
Follow-up Study. *JAMA Netw Open*. 2020;3(11):e2021701.  
doi:10.1001/jamanetworkopen.2020.21701

**eTable.** Multivariable-Adjusted Association of Alternative Healthy Eating Index 2010  
Components With Erectile Dysfunction, by Dietary Index Score Component

**eFigure.** Study Flowchart

This supplemental material has been provided by the authors to give readers additional  
information about their work.

**eTable.** Multivariable-Adjusted Association of Alternative Healthy Eating Index 2010 Components With Erectile Dysfunction, by Dietary Index Score Component

|                                                  | <i>Quintile of Alternative Healthy Eating Index 2010 component score<sup>b</sup></i> |                   |                   |                   |                   | <i>P for trend<sup>c</sup></i> |
|--------------------------------------------------|--------------------------------------------------------------------------------------|-------------------|-------------------|-------------------|-------------------|--------------------------------|
|                                                  | <b>Q1</b>                                                                            | <b>Q2</b>         | <b>Q3</b>         | <b>Q4</b>         | <b>Q5</b>         |                                |
| <b>Healthy Components<sup>d</sup></b>            |                                                                                      |                   |                   |                   |                   |                                |
| Vegetables, score                                |                                                                                      |                   |                   |                   |                   |                                |
| Mean (SD)                                        | 3.0 (0.7)                                                                            | 4.6 (0.4)         | 5.9 (0.4)         | 7.3 (0.5)         | 9.1 (0.6)         | NA                             |
| HR (95% CI)                                      | 1 [Reference]                                                                        | 0.98 (0.92, 1.05) | 0.94 (0.88, 1.00) | 0.91 (0.85, 0.97) | 0.85 (0.79, 0.91) | <.001                          |
| Fruit, score                                     |                                                                                      |                   |                   |                   |                   |                                |
| Mean (SD)                                        | 1.3 (0.5)                                                                            | 2.6 (0.3)         | 3.8 (0.4)         | 5.2 (0.5)         | 7.6 (1.1)         | NA                             |
| HR (95% CI)                                      | 1 [Reference]                                                                        | 0.98 (0.92, 1.05) | 0.96 (0.90, 1.03) | 0.88 (0.82, 0.94) | 0.88 (0.82, 0.94) | <.001                          |
| Whole grains, score                              |                                                                                      |                   |                   |                   |                   |                                |
| Mean (SD)                                        | 1.0 (0.4)                                                                            | 2.0 (0.3)         | 2.8 (0.3)         | 3.8 (0.4)         | 5.7 (1.1)         |                                |
| HR (95% CI)                                      | 1 [Reference]                                                                        | 1.00 (0.93, 1.07) | 1.01 (0.94, 1.08) | 0.98 (0.91, 1.05) | 0.98 (0.91, 1.05) | .40                            |
| Legumes and nuts, score                          |                                                                                      |                   |                   |                   |                   |                                |
| Mean (SD)                                        | 1.2 (0.5)                                                                            | 2.5 (0.4)         | 3.9 (0.5)         | 5.5 (0.6)         | 8.1 (1.1)         | NA                             |
| HR (95% CI)                                      | 1 [Reference]                                                                        | 1.00 (0.93, 1.07) | 0.98 (0.91, 1.05) | 0.98 (0.91, 1.05) | 0.94 (0.87, 1.01) | .06                            |
| Polyunsaturated fat, score                       |                                                                                      |                   |                   |                   |                   |                                |
| Mean (SD)                                        | 2.8 (0.5)                                                                            | 3.8 (0.3)         | 4.5 (0.2)         | 5.3 (0.3)         | 6.6 (0.8)         | NA                             |
| HR (95% CI)                                      | 1 [Reference]                                                                        | 0.97 (0.91, 1.04) | 1.01 (0.94, 1.08) | 1.03 (0.96, 1.10) | 1.04 (0.97, 1.11) | .07                            |
| Long-chain (n-3) fats, score                     |                                                                                      |                   |                   |                   |                   |                                |
| Mean (SD)                                        | 3.4 (1.3)                                                                            | 6.5 (0.7)         | 8.4 (0.5)         | 9.6 (0.3)         | 10 (0)            | NA                             |
| HR (95% CI)                                      | 1 [Reference]                                                                        | 0.99 (0.93, 1.06) | 0.93 (0.88, 0.99) | 0.95 (0.88, 1.02) | 0.88 (0.83, 0.94) | <.001                          |
| <b>Unhealthy Components<sup>e</sup></b>          |                                                                                      |                   |                   |                   |                   |                                |
| <i>trans</i> fat, score                          |                                                                                      |                   |                   |                   |                   |                                |
| Mean (SD)                                        | 6.0 (0.7)                                                                            | 7.2 (0.3)         | 7.9 (0.2)         | 8.5 (0.2)         | 9.3 (0.3)         | NA                             |
| HR (95% CI)                                      | 1 [Reference]                                                                        | 0.96 (0.90, 1.02) | 0.95 (0.89, 1.01) | 0.95 (0.89, 1.01) | 0.87 (0.81, 0.93) | <.001                          |
| Sodium, score                                    |                                                                                      |                   |                   |                   |                   |                                |
| Mean (SD)                                        | 1.4 (0.7)                                                                            | 3.4 (0.5)         | 5.0 (0.5)         | 6.7 (0.5)         | 8.6 (0.7)         | NA                             |
| HR (95% CI)                                      | 1 [Reference]                                                                        | 0.99 (0.92, 1.07) | 0.97 (0.89, 1.05) | 0.96 (0.88, 1.05) | 0.95 (0.86, 1.05) | .26                            |
| Red or processed meat, score                     |                                                                                      |                   |                   |                   |                   |                                |
| Mean (SD)                                        | 0.1 (0.1)                                                                            | 1.4 (0.7)         | 3.7 (0.7)         | 5.9 (0.6)         | 8.0 (0.7)         | NA                             |
| HR (95% CI)                                      | 1 [Reference]                                                                        | 1.05 (0.98, 1.12) | 0.96 (0.90, 1.03) | 0.91 (0.85, 0.98) | 0.86 (0.80, 0.93) | <.001                          |
| Sugar-sweetened beverages and fruit juice, score |                                                                                      |                   |                   |                   |                   |                                |
| Mean (SD)                                        | 0 (0)                                                                                | 0.4 (0.2)         | 1.6 (0.6)         | 4.0 (0.8)         | 7.3 (1.3)         | NA                             |
| HR (95% CI)                                      | 1 [Reference]                                                                        | 1.02 (0.95, 1.10) | 1.05 (0.99, 1.11) | 1.06 (1.00, 1.13) | 1.03 (0.97, 1.10) | .37                            |

| <i>eTable Cont'd</i>                   | <b>Quintile of Alternative Healthy Eating Index 2010 component score<sup>b</sup></b> |                   |                   |                   |                   |                                |
|----------------------------------------|--------------------------------------------------------------------------------------|-------------------|-------------------|-------------------|-------------------|--------------------------------|
|                                        | <b>Q1</b>                                                                            | <b>Q2</b>         | <b>Q3</b>         | <b>Q4</b>         | <b>Q5</b>         | <b>P for trend<sup>c</sup></b> |
| <b>Moderate Components<sup>f</sup></b> |                                                                                      |                   |                   |                   |                   |                                |
| Alcohol, score                         |                                                                                      |                   |                   |                   |                   |                                |
| Mean (SD)                              | 2.3 (0.6)                                                                            | 3.8 (0.5)         | 5.5 (0.5)         | 7.7 (0.7)         | 9.7 (0.4)         | NA                             |
| HR (95% CI)                            | 1 [Reference]                                                                        | 0.98 (0.91, 1.04) | 0.93 (0.87, 0.99) | 0.94 (0.88, 1.00) | 0.96 (0.90, 1.02) | .20                            |

Abbreviations: HR, hazard ratio; NA not applicable; Q, quintile.

- <sup>a</sup> Adjusted for age, race, body mass index, smoking, physical activity, hyperlipidemia, hypertension, depression, antidepressant or antipsychotic medication use, benzodiazepine use,  $\alpha$ -blocker or 5 $\alpha$ -reductase inhibitor use, incident cardiovascular disease or diabetes during follow-up, caloric intake, and marital status.
- <sup>b</sup> Higher dietary index score indicates greater adherence to the Healthy Eating Pyramid guidelines from the Department of Nutrition, Harvard T.H. Chan School of Public Health (component score range: 0 to 10). Exposures were defined as Q.
- <sup>c</sup> P for trend calculated by modeling the median of each Q.
- <sup>d</sup> Lower intake indicates less healthy; higher intake, healthier.
- <sup>e</sup> Lower intake indicates healthier; higher intake, less healthy.
- <sup>f</sup> Moderate intake indicates healthier; higher and lower intake, less healthy.

**eFigure.** Study flowchart.

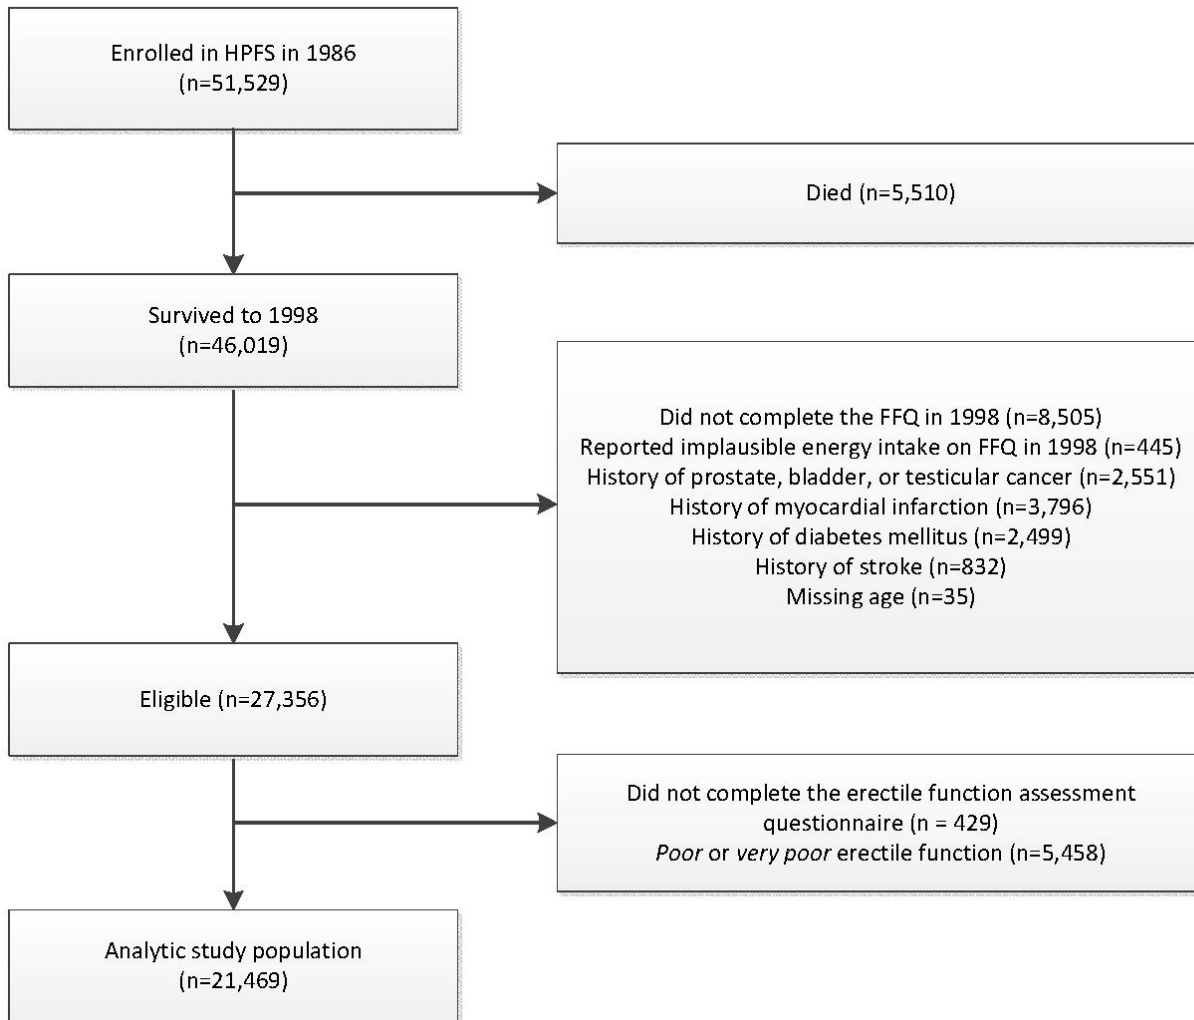

Supplement: jamanetwopen-e2021701-s001.pdf [file jamanetwopen-e2021701-s001.pdf]
